# Supplementary material for: TGFβ-activated kinase 1 signaling controls acquisition of the inflammatory fibroblast phenotype and regulates cardiac remodeling after myocardial infarction
Source: Research Square preprint supplement (doi:10.21203/rs.3.rs-6122755/v1), 2025-03-12
Supplement: Supplementary file 1 [file 26dee1744acbffa3a5d9b053.xlsx]

## Sheet: Figure 1f-1j
	Figure 1f (p-NFkB : total NFkB)
	ANOVA table	SS	DF	MS	F (DFn, DFd)	P value
	Virus x Ligands	27.23	1	27.23	F (1, 16) = 4.503	P=0.0498
	Virus	27.34	1	27.34	F (1, 16) = 4.521	P=0.0494
	Ligands	62.2	1	62.2	F (1, 16) = 10.28	P=0.0055
	Figure 1f (p-p38 : total p38)
	Virus x Ligands	14.29	1	14.29	F (1, 16) = 42.81	P<0.0001
	Virus	15.5	1	15.5	F (1, 16) = 46.44	P<0.0001
	Ligands	19.25	1	19.25	F (1, 16) = 57.66	P<0.0001
	Figure 1f (p-SAPK/JNK : total SAPK/JNK)
	Virus x Ligands	9.56	1	9.56	F (1, 16) = 30.66	P<0.0001
	Virus	11.53	1	11.53	F (1, 16) = 36.98	P<0.0001
	Ligands	16.12	1	16.12	F (1, 16) = 51.71	P<0.0001
	Figure 1f (IkBa : Amido Black)
	Virus x Ligands	0.6982	1	0.6982	F (1, 16) = 56.01	P<0.0001
	Virus	0.7361	1	0.7361	F (1, 16) = 59.05	P<0.0001
	Ligands	1.428	1	1.428	F (1, 16) = 114.5	P<0.0001
	Figure 1h (p-NFkB : total NFkB)
	Virus x Ligands	11.89	1	11.89	F (1, 16) = 4.541	P=0.0489
	Virus	12.08	1	12.08	F (1, 16) = 4.615	P=0.0473
	Ligands	23.25	1	23.25	F (1, 16) = 8.879	P=0.0088
	Figure 1h (p-p38 : total p38)
	Virus x Ligands	8.025	1	8.025	F (1, 16) = 7.628	P=0.0139
	Virus	4.46	1	4.46	F (1, 16) = 4.239	P=0.0562
	Ligands	11.92	1	11.92	F (1, 16) = 11.33	P=0.0039
	Figure 1h (p-SAPK/JNK : total SAPK/JNK)
	Virus x Ligands	1485	1	1485	F (1, 16) = 48.24	P<0.0001
	Virus	1515	1	1515	F (1, 16) = 49.22	P<0.0001
	Ligands	1619	1	1619	F (1, 16) = 52.59	P<0.0001
	Figure 1h (IkBa : Amido Black)
	Virus x Ligands	0.4377	1	0.4377	F (1, 16) = 27.93	P<0.0001
	Virus	0.5453	1	0.5453	F (1, 16) = 34.79	P<0.0001
	Ligands	2.171	1	2.171	F (1, 16) = 138.5	P<0.0001
	Figure 1j (Anti-puromycin : ug cell protein)
	Virus x Ligands	0.0001178	3	3.925e-05	F (3, 24) = 3.767	P=0.0239
	Virus	8.674e-06	1	8.674e-06	F (1, 24) = 0.8326	P=0.3706
	Ligands	0.0001995	3	6.651e-05	F (3, 24) = 6.384	P=0.0025

## Sheet: Figure 2c-2j
	Figure 2c (TAK1 : Amido Black)
	Unpaired t test
	P value	<0.0001
	P value summary	****
	Significantly different (P < 0.05)?	Yes
	One- or two-tailed P value?	Two-tailed
	t, df	t=9.321, df=12
	Sample size, column A	7
	Sample size, column B	7
	Figure 2e (Males : Ejection Fraction)
	ANOVA table	SS	DF	MS	F (DFn, DFd)	P value
	Time x Column Factor	33.95	1	33.95	F (1, 22) = 1.313	P=0.2642
	Time	226	1	226	F (1, 22) = 8.742	P=0.0073
	Column Factor	2037	1	2037	F (1, 22) = 8.483	P=0.0081
	Subject	5284	22	240.2	F (22, 22) = 9.289	P<0.0001
	Figure 2e (Males : Cardiac Output)
	Time x Column Factor	0.2543	1	0.2543	F (1, 22) = 0.03151	P=0.8607
	Time	160	1	160	F (1, 22) = 19.82	P=0.0002
	Column Factor	226.2	1	226.2	F (1, 22) = 6.365	P=0.0194
	Subject	781.8	22	35.54	F (22, 22) = 4.403	P=0.0005
	Figure 2e (Females : Ejection Fraction)
	Time x Column Factor	32.2	1	32.2	F (1, 27) = 0.9251	P=0.3447
	Time	115.3	1	115.3	F (1, 27) = 3.313	P=0.0798
	Column Factor	666.7	1	666.7	F (1, 27) = 2.067	P=0.1620
	Subject	8709	27	322.6	F (27, 27) = 9.266	P<0.0001
	Figure 2e (Females : Cardiac Output)
	Time x Column Factor	0.401	1	0.401	F (1, 27) = 0.04716	P=0.8297
	Time	176.3	1	176.3	F (1, 27) = 20.73	P=0.0001
	Column Factor	7.646	1	7.646	F (1, 27) = 0.4939	P=0.4882
	Subject	418	27	15.48	F (27, 27) = 1.821	P=0.0628
	Figure 2i (Females : Scar mass)
	Mann Whitney test
	P value	0.443
	Exact or approximate P value?	Exact
	P value summary	ns
	Significantly different (P < 0.05)?	No
	One- or two-tailed P value?	Two-tailed
	Sum of ranks in column A,B	187 , 164
	Mann-Whitney U	67
	Figure 2i (Males : Scar mass)
	Unpaired t test
	P value	0.0063
	P value summary	**
	Significantly different (P < 0.05)?	Yes
	One- or two-tailed P value?	Two-tailed
	t, df	t=3.116, df=17
	Figure 2j (Females : Scar width)
	Unpaired t test
	P value	0.272
	P value summary	ns
	Significantly different (P < 0.05)?	No
	One- or two-tailed P value?	Two-tailed
	t, df	t=1.124, df=24
	Figure 2j (Males : Scar width)
	Unpaired t test
	P value	0.0189
	P value summary	*
	Significantly different (P < 0.05)?	Yes
	One- or two-tailed P value?	Two-tailed
	t, df	t=2.593, df=17

## Sheet: Figure 3c
	Figure 3c (CD45pos)
	ANOVA table	SS (Type III)	DF	MS	F (DFn, DFd)	P value
	Interaction	38675876	2	19337938	F (2, 50) = 2.107	P=0.1323
	Row Factor	143708796	2	71854398	F (2, 50) = 7.829	P=0.0011
	Column Factor	45370498	1	45370498	F (1, 50) = 4.943	P=0.0307
	Figure 3c (Neutrophils)
	Interaction	16197913	2	8098956	F (2, 50) = 3.635	P=0.0336
	Row Factor	72455146	2	36227573	F (2, 50) = 16.26	P<0.0001
	Column Factor	9956008	1	9956008	F (1, 50) = 4.469	P=0.0395
	Figure 3c (CCR2pos Macrophages)
	Interaction	997960	2	498980	F (2, 50) = 0.8553	P=0.4313
	Row Factor	22589726	2	11294863	F (2, 50) = 19.36	P<0.0001
	Column Factor	752272	1	752272	F (1, 50) = 1.289	P=0.2616
	Figure 3c (CCR2neg Macrophages)
	Interaction	128439	2	64219	F (2, 50) = 0.6567	P=0.5230
	Row Factor	1462557	2	731278	F (2, 50) = 7.478	P=0.0014
	Column Factor	285192	1	285192	F (1, 50) = 2.916	P=0.0939
	Figure 3c (Ly6Chi Monocytes)
	Interaction	119516	2	59758	F (2, 50) = 0.1594	P=0.8531
	Row Factor	7700480	2	3850240	F (2, 50) = 10.27	P=0.0002
	Column Factor	416288	1	416288	F (1, 50) = 1.111	P=0.2970
	Figure 3c (Ly6Clo Monocytes)
	Interaction	294961	2	147480	F (2, 50) = 4.471	P=0.0164
	Row Factor	13340	2	6670	F (2, 50) = 0.2022	P=0.8176
	Column Factor	313404	1	313404	F (1, 50) = 9.500	P=0.0033

## Sheet: Figure 4a
	Figure 4a
		G-CSF
	ANOVA table	SS	DF	MS	F (DFn, DFd)	P value
	Interaction	1674	2	836.9	F (2, 18) = 6.393	P=0.0080
	Row Factor	842.4	1	842.4	F (1, 18) = 6.435	P=0.0207
	Column Factor	5496	2	2748	F (2, 18) = 20.99	P<0.0001
		GM-CSF
	Interaction	0.1499	2	0.07497	F (2, 18) = 0.8399	P=0.4480
	Row Factor	0.4156	1	0.4156	F (1, 18) = 4.656	P=0.0447
	Column Factor	3.036	2	1.518	F (2, 18) = 17.01	P<0.0001
		LIF
	Interaction	0.339	2	0.1695	F (2, 18) = 10.05	P=0.0012
	Row Factor	0.3556	1	0.3556	F (1, 18) = 21.08	P=0.0002
	Column Factor	0.412	2	0.206	F (2, 18) = 12.21	P=0.0004
		VEGF
	Interaction	12.87	2	6.433	F (2, 18) = 4.030	P=0.0358
	Row Factor	7.576	1	7.576	F (1, 18) = 4.746	P=0.0429
	Column Factor	100.7	2	50.33	F (2, 18) = 31.52	P<0.0001
		IL-3
	Interaction	0.006584	2	0.003292	F (2, 18) = 2.723	P=0.0926
	Row Factor	0.0007027	1	0.0007027	F (1, 18) = 0.5813	P=0.4557
	Column Factor	0.02888	2	0.01444	F (2, 18) = 11.94	P=0.0005
		IL-6
	Interaction	58671	2	29335	F (2, 17) = 1.797	P=0.1959
	Row Factor	22550	1	22550	F (1, 17) = 1.381	P=0.2561
	Column Factor	871622	2	435811	F (2, 17) = 26.70	P<0.0001
		IL-7
	Interaction	0.1287	2	0.06435	F (2, 18) = 4.440	P=0.0271
	Row Factor	0.02429	1	0.02429	F (1, 18) = 1.675	P=0.2119
	Column Factor	0.06585	2	0.03293	F (2, 18) = 2.272	P=0.1319
		IL-10
	Interaction	0.05791	2	0.02896	F (2, 18) = 0.7550	P=0.4843
	Row Factor	0.02536	1	0.02536	F (1, 18) = 0.6612	P=0.4268
	Column Factor	0.5266	2	0.2633	F (2, 18) = 6.866	P=0.0061
		IL-15
	Interaction	0.6308	2	0.3154	F (2, 18) = 2.136	P=0.1471
	Row Factor	0.06135	1	0.06135	F (1, 18) = 0.4155	P=0.5273
	Column Factor	0.8642	2	0.4321	F (2, 18) = 2.927	P=0.0794
		IL-12p70
	Interaction	0.9035	2	0.4518	F (2, 18) = 0.8922	P=0.4271
	Row Factor	0.1839	1	0.1839	F (1, 18) = 0.3632	P=0.5543
	Column Factor	1.739	2	0.8697	F (2, 18) = 1.718	P=0.2076
		IL-9
	Interaction	2.024	2	1.012	F (2, 18) = 3.745	P=0.0437
	Row Factor	0.1113	1	0.1113	F (1, 18) = 0.4118	P=0.5292
	Column Factor	7.792	2	3.896	F (2, 18) = 14.41	P=0.0002
		IFNb-1
	Interaction	0.0004421	2	0.0002211	F (2, 18) = 0.1461	P=0.8651
	Row Factor	1.217e-06	1	1.217e-06	F (1, 18) = 0.0008044	P=0.9777
	Column Factor	0.02328	2	0.01164	F (2, 18) = 7.689	P=0.0039
		MCP-1
		SS	DF	MS	F (DFn, DFd)	P value
	Interaction	67162	2	33581	F (2, 18) = 8.532	P=0.0025
	Row Factor	27781	1	27781	F (1, 18) = 7.059	P=0.0161
	Column Factor	528905	2	264452	F (2, 18) = 67.19	P<0.0001
		IP-10
	Interaction	19.76	2	9.878	F (2, 18) = 5.359	P=0.0149
	Row Factor	7.446	1	7.446	F (1, 18) = 4.040	P=0.0597
	Column Factor	48.39	2	24.2	F (2, 18) = 13.13	P=0.0003
		MCP-5
	Interaction	0.1741	2	0.08705	F (2, 18) = 14.02	P=0.0002
	Row Factor	0.1225	1	0.1225	F (1, 18) = 19.72	P=0.0003
	Column Factor	0.5135	2	0.2568	F (2, 18) = 41.35	P<0.0001
		RANTES
	Interaction	23.83	2	11.92	F (2, 18) = 9.058	P=0.0019
	Row Factor	11.03	1	11.03	F (1, 18) = 8.383	P=0.0096
	Column Factor	33.9	2	16.95	F (2, 18) = 12.88	P=0.0003
		MIP-3a
	Interaction	1.722	2	0.861	F (2, 18) = 42.22	P<0.0001
	Row Factor	0.8014	1	0.8014	F (1, 18) = 39.30	P<0.0001
	Column Factor	3.102	2	1.551	F (2, 18) = 76.05	P<0.0001
		Fractalkine
	Interaction	0.02484	2	0.01242	F (2, 18) = 0.2309	P=0.7961
	Row Factor	0.01232	1	0.01232	F (1, 18) = 0.2290	P=0.6380
	Column Factor	3.993	2	1.997	F (2, 18) = 37.12	P<0.0001
		Eotaxin
	Interaction	0.06723	2	0.03362	F (2, 18) = 1.133	P=0.3441
	Row Factor	0.04396	1	0.04396	F (1, 18) = 1.481	P=0.2393
	Column Factor	1.3	2	0.6502	F (2, 18) = 21.91	P<0.0001
		MIP-1b
	Interaction	1.488	2	0.7441	F (2, 17) = 1.030	P=0.3783
	Row Factor	0.8533	1	0.8533	F (1, 17) = 1.181	P=0.2923
	Column Factor	6.332	2	3.166	F (2, 17) = 4.382	P=0.0292
		LIX
	Interaction	2112	2	1056	F (2, 18) = 5.852	P=0.0110
	Row Factor	909.5	1	909.5	F (1, 18) = 5.040	P=0.0376
	Column Factor	3362	2	1681	F (2, 18) = 9.314	P=0.0017
		KC
	Interaction	296249	2	148124	F (2, 18) = 14.10	P=0.0002
	Row Factor	148654	1	148654	F (1, 18) = 14.15	P=0.0014
	Column Factor	749295	2	374648	F (2, 18) = 35.66	P<0.0001

## Sheet: Figure 4c
	Figure 4c
	ANOVA table	SS	DF	MS	F (DFn, DFd)	P value
	Interaction	0.01295	1	0.01295	F (1, 16) = 12.27	P=0.0029
	Row Factor	0.0258	1	0.0258	F (1, 16) = 24.44	P=0.0001
	Column Factor	0.02969	1	0.02969	F (1, 16) = 28.13	P<0.0001

## Sheet: Figure 4f
	Figure 4f
		AA
	ANOVA table	SS	DF	MS	F (DFn, DFd)	P value
	Interaction	0.1574	1	0.1574	F (1, 8) = 0.1480	P=0.7105
	Row Factor	2.276	1	2.276	F (1, 8) = 2.141	P=0.1816
	Column Factor	4.523	1	4.523	F (1, 8) = 4.254	P=0.0731
		PGE2
	Interaction	0.07779	1	0.07779	F (1, 8) = 2.336	P=0.1649
	Row Factor	0.07779	1	0.07779	F (1, 8) = 2.336	P=0.1649
	Column Factor	1.51	1	1.51	F (1, 8) = 45.37	P=0.0001
		15-keto-PGE2
	Interaction	0.03963	1	0.03963	F (1, 8) = 0.04482	P=0.8376
	Row Factor	6.028	1	6.028	F (1, 8) = 6.817	P=0.0311
	Column Factor	0.4681	1	0.4681	F (1, 8) = 0.5294	P=0.4876
		PGD2
	Interaction	0.5299	1	0.5299	F (1, 8) = 0.8727	P=0.3775
	Row Factor	5.157	1	5.157	F (1, 8) = 8.493	P=0.0195
	Column Factor	0.5041	1	0.5041	F (1, 8) = 0.8302	P=0.3889
		PGJ2
	Interaction	13.95	1	13.95	F (1, 8) = 8.867	P=0.0177
	Row Factor	47.65	1	47.65	F (1, 8) = 30.29	P=0.0006
	Column Factor	8.519	1	8.519	F (1, 8) = 5.415	P=0.0484
		15-deoxy-PGJ2
	Interaction	2.757e-05	1	2.757e-05	F (1, 8) = 0.03343	P=0.8595
	Row Factor	0.01885	1	0.01885	F (1, 8) = 22.85	P=0.0014
	Column Factor	0.002528	1	0.002528	F (1, 8) = 3.065	P=0.1181
		PGF2a
	Interaction	0.005304	1	0.005304	F (1, 8) = 0.5790	P=0.4685
	Row Factor	0.08245	1	0.08245	F (1, 8) = 9.000	P=0.0171
	Column Factor	0.02315	1	0.02315	F (1, 8) = 2.527	P=0.1506
		8-iso-PGF2a
	Interaction	0.01646	1	0.01646	F (1, 8) = 1.636	P=0.2367
	Row Factor	0.02971	1	0.02971	F (1, 8) = 2.953	P=0.1240
	Column Factor	0.05147	1	0.05147	F (1, 8) = 5.116	P=0.0536
		15-HETE
	Interaction	3.82e-05	1	3.82e-05	F (1, 8) = 0.004856	P=0.9462
	Row Factor	0.09288	1	0.09288	F (1, 8) = 11.81	P=0.0089
	Column Factor	0.06357	1	0.06357	F (1, 8) = 8.080	P=0.0217
		LXB4
	Interaction	0.007124	1	0.007124	F (1, 8) = 0.1316	P=0.7262
	Row Factor	0.08344	1	0.08344	F (1, 8) = 1.541	P=0.2496
	Column Factor	0.1354	1	0.1354	F (1, 8) = 2.500	P=0.1525
		LXA4
	Interaction	0.141	1	0.141	F (1, 8) = 1.110	P=0.3228
	Row Factor	3.749	1	3.749	F (1, 8) = 29.52	P=0.0006
	Column Factor	0.1357	1	0.1357	F (1, 8) = 1.069	P=0.3315
		15(R)-LXA4
	Interaction	0.1885	1	0.1885	F (1, 8) = 4.527	P=0.0660
	Row Factor	1.734	1	1.734	F (1, 8) = 41.63	P=0.0002
	Column Factor	0.001858	1	0.001858	F (1, 8) = 0.04462	P=0.8380
		5, 15-diHETE
	Interaction	0.0001088	1	0.0001088	F (1, 8) = 0.03749	P=0.8513
	Row Factor	0.01494	1	0.01494	F (1, 8) = 5.146	P=0.0530
	Column Factor	0.03014	1	0.03014	F (1, 8) = 10.38	P=0.0122
		12-HETE
	Interaction	0.009375	1	0.009375	F (1, 8) = 0.2306	P=0.6440
	Row Factor	0.05479	1	0.05479	F (1, 8) = 1.348	P=0.2792
	Column Factor	0.2578	1	0.2578	F (1, 8) = 6.341	P=0.0359
		5-HETE
	Interaction	0.001003	1	0.001003	F (1, 8) = 0.04873	P=0.8308
	Row Factor	0.4306	1	0.4306	F (1, 8) = 20.91	P=0.0018
	Column Factor	0.09516	1	0.09516	F (1, 8) = 4.622	P=0.0638
		6-trans-LTB4
	Interaction	0.000784	1	0.000784	F (1, 8) = 1.263	P=0.2937
	Row Factor	0.01479	1	0.01479	F (1, 8) = 23.83	P=0.0012
	Column Factor	0.003551	1	0.003551	F (1, 8) = 5.721	P=0.0437
		6-trans, 12-epi-LTB4
	Interaction	4.81e-05	1	4.81e-05	F (1, 8) = 0.5639	P=0.4742
	Row Factor	0.0002573	1	0.0002573	F (1, 8) = 3.016	P=0.1206
	Column Factor	0.0006006	1	0.0006006	F (1, 8) = 7.042	P=0.0291
		LTB4
	Interaction	1.224e-07	1	1.224e-07	F (1, 8) = 0.0008540	P=0.9774
	Row Factor	0.002032	1	0.002032	F (1, 8) = 14.17	P=0.0055
	Column Factor	0.0003677	1	0.0003677	F (1, 8) = 2.564	P=0.1480
		DHA
	Interaction	0.5033	1	0.5033	F (1, 8) = 0.5228	P=0.4902
	Row Factor	0.08507	1	0.08507	F (1, 8) = 0.08837	P=0.7738
	Column Factor	11.06	1	11.06	F (1, 8) = 11.49	P=0.0095
		4-HDHA
	Interaction	0.0001775	1	0.0001775	F (1, 8) = 0.04508	P=0.8372
	Row Factor	0.02589	1	0.02589	F (1, 8) = 6.577	P=0.0334
	Column Factor	0.03278	1	0.03278	F (1, 8) = 8.327	P=0.0203
		17-HDHA
	Interaction	2.637e-06	1	2.637e-06	F (1, 8) = 0.003448	P=0.9546
	Row Factor	0.006598	1	0.006598	F (1, 8) = 8.626	P=0.0188
	Column Factor	0.009994	1	0.009994	F (1, 8) = 13.06	P=0.0068
		RvD1
	Interaction	4.825e-05	1	4.825e-05	F (1, 8) = 0.4051	P=0.5423
	Row Factor	0.003399	1	0.003399	F (1, 8) = 28.54	P=0.0007
	Column Factor	0.003929	1	0.003929	F (1, 8) = 32.98	P=0.0004
		RvD4
	Interaction	0.1515	1	0.1515	F (1, 8) = 1.435	P=0.2653
	Row Factor	2.6	1	2.6	F (1, 8) = 24.62	P=0.0011
	Column Factor	0.1235	1	0.1235	F (1, 8) = 1.170	P=0.3110
		7-HDHA
	Interaction	2.25e-06	1	2.25e-06	F (1, 8) = 0.006955	P=0.9356
	Row Factor	0.0005473	1	0.0005473	F (1, 8) = 1.692	P=0.2296
	Column Factor	0.007952	1	0.007952	F (1, 8) = 24.58	P=0.0011
		14-HDHA
	Interaction	6.11e-07	1	6.11e-07	F (1, 8) = 0.0006199	P=0.9807
	Row Factor	0.005484	1	0.005484	F (1, 8) = 5.564	P=0.0460
	Column Factor	0.01334	1	0.01334	F (1, 8) = 13.53	P=0.0062
		EPA
	Interaction	0.05664	1	0.05664	F (1, 8) = 0.1604	P=0.6993
	Row Factor	0.002221	1	0.002221	F (1, 8) = 0.006290	P=0.9387
	Column Factor	6.533	1	6.533	F (1, 8) = 18.50	P=0.0026
		12-HEPE
	Interaction	0.0023	1	0.0023	F (1, 8) = 0.7232	P=0.4198
	Row Factor	0.004388	1	0.004388	F (1, 8) = 1.380	P=0.2739
	Column Factor	0.04403	1	0.04403	F (1, 8) = 13.84	P=0.0059
		18-HEPE
	Interaction	0.04288	1	0.04288	F (1, 8) = 0.4071	P=0.5413
	Row Factor	0.09836	1	0.09836	F (1, 8) = 0.9338	P=0.3622
	Column Factor	1.183	1	1.183	F (1, 8) = 11.23	P=0.0101
		RvE1
	Interaction	0.0001434	1	0.0001434	F (1, 8) = 0.1088	P=0.7500
	Row Factor	0.0007968	1	0.0007968	F (1, 8) = 0.6045	P=0.4592
	Column Factor	0.002173	1	0.002173	F (1, 8) = 1.649	P=0.2351
		RvE2
	Interaction	0.0004289	1	0.0004289	F (1, 8) = 0.3041	P=0.5964
	Row Factor	0.02597	1	0.02597	F (1, 8) = 18.42	P=0.0026
	Column Factor	0.01398	1	0.01398	F (1, 8) = 9.909	P=0.0136
		RvE4
	Interaction	0.0004829	1	0.0004829	F (1, 8) = 0.01711	P=0.8991
	Row Factor	0.3301	1	0.3301	F (1, 8) = 11.70	P=0.0091
	Column Factor	0.08109	1	0.08109	F (1, 8) = 2.874	P=0.1285
		15-HEPE
	Interaction	0.000296	1	0.000296	F (1, 8) = 0.2502	P=0.6304
	Row Factor	0.001827	1	0.001827	F (1, 8) = 1.544	P=0.2492
	Column Factor	0.01874	1	0.01874	F (1, 8) = 15.83	P=0.0041
		5-HEPE
	Interaction	0.0001088	1	0.0001088	F (1, 8) = 0.07785	P=0.7873
	Row Factor	0.003215	1	0.003215	F (1, 8) = 2.300	P=0.1678
	Column Factor	0.01968	1	0.01968	F (1, 8) = 14.08	P=0.0056
		LXA5
	Interaction	6.719e-06	1	6.719e-06	F (1, 8) = 0.01293	P=0.9123
	Row Factor	0.002263	1	0.002263	F (1, 8) = 4.355	P=0.0704
	Column Factor	0.001899	1	0.001899	F (1, 8) = 3.655	P=0.0923
		14, 15-EET
	Interaction	4.149e-05	1	4.149e-05	F (1, 8) = 0.004243	P=0.9497
	Row Factor	0.1209	1	0.1209	F (1, 8) = 12.36	P=0.0079
	Column Factor	0.0782	1	0.0782	F (1, 8) = 7.996	P=0.0222
		17, 18-EpETE
	Interaction	0.04194	1	0.04194	F (1, 8) = 0.4293	P=0.5307
	Row Factor	0.08464	1	0.08464	F (1, 8) = 0.8664	P=0.3792
	Column Factor	1.043	1	1.043	F (1, 8) = 10.68	P=0.0114
		DPA
	Interaction	0.004633	1	0.004633	F (1, 8) = 0.2726	P=0.6157
	Row Factor	0.02665	1	0.02665	F (1, 8) = 1.568	P=0.2458
	Column Factor	0.2079	1	0.2079	F (1, 8) = 12.23	P=0.0081

## Sheet: Figure 5e
	Figure 5e
	iNOS
	ANOVA table	SS	DF	MS	F (DFn, DFd)	P value
	Interaction	21.85	3	7.283	F (3, 24) = 33.97	P<0.0001
	Row Factor	7.341	1	7.341	F (1, 24) = 34.23	P<0.0001
	Column Factor	25.39	3	8.464	F (3, 24) = 39.47	P<0.0001
	COX2
	Interaction	18.69	3	6.23	F (3, 24) = 5.830	P=0.0039
	Row Factor	9.481	1	9.481	F (1, 24) = 8.874	P=0.0065
	Column Factor	19.5	3	6.501	F (3, 24) = 6.085	P=0.0031
	MMP3
	Interaction	11.3	3	3.768	F (3, 24) = 12.13	P<0.0001
	Row Factor	3.848	1	3.848	F (1, 24) = 12.38	P=0.0018
	Column Factor	14.99	3	4.996	F (3, 24) = 16.08	P<0.0001

## Sheet: Suppl. Fig. 1
	Supplementary Figure 1c-1e
	Collagen
	ANOVA table	SS	DF	MS	F (DFn, DFd)	P value
	Treatment (between columns)	0.02352	5	0.004705	F (5, 18) = 5.990	P=0.0020
	Residual (within columns)	0.01414	18	0.0007854
	Total	0.03766	23
	Periostin
	Kruskal-Wallis test
	P value	0.0053
	Exact or approximate P value?	Approximate
	P value summary	**
	Do the medians vary signif. (P < 0.05)?	Yes
	Number of groups	6
	Kruskal-Wallis statistic	16.62
	a-SMA
	ANOVA table	SS	DF	MS	F (DFn, DFd)	P value
	Treatment (between columns)	0.000341	5	6.821e-05	F (5, 18) = 20.59	P<0.0001
	Residual (within columns)	5.963e-05	18	3.313e-06
	Total	0.0004007	23
	Supplementary Figure 1g-1i
	Puromycin
	ANOVA table	SS	DF	MS	F (DFn, DFd)	P value
	Treatment (between columns)	0.001461	9	0.0001624	F (9, 30) = 36.43	P<0.0001
	Residual (within columns)	0.0001337	30	4.456e-06
	Total	0.001595	39
	Collagen
	ANOVA table	SS	DF	MS	F (DFn, DFd)	P value
	Treatment (between columns)	0.0001427	9	1.586e-05	F (9, 30) = 25.89	P<0.0001
	Residual (within columns)	1.838e-05	30	6.126e-07
	Total	0.0001611	39
	Periostin
	ANOVA table	SS	DF	MS	F (DFn, DFd)	P value
	Treatment (between columns)	0.0005116	9	5.684e-05	F (9, 30) = 64.05	P<0.0001
	Residual (within columns)	2.662e-05	30	8.874e-07
	Total	0.0005382	39

## Sheet: Suppl. Fig. 2
	Supplementary Figure 2a-2c
	PrestoBlue assay
	ANOVA table	SS	DF	MS	F (DFn, DFd)	P value
	Interaction	373161	3	124387	F (3, 24) = 0.1409	P=0.9345
	Row Factor	331714	1	331714	F (1, 24) = 0.3756	P=0.5457
	Column Factor	64777885	3	21592628	F (3, 24) = 24.45	P<0.0001
	p-Smad3 : total Smad3
	ANOVA table	SS	DF	MS	F (DFn, DFd)	P value
	Interaction	0.4106	1	0.4106	F (1, 16) = 1.017	P=0.3283
	Row Factor	0.4081	1	0.4081	F (1, 16) = 1.011	P=0.3297
	Column Factor	28.58	1	28.58	F (1, 16) = 70.77	P<0.0001
	p-p38 : total p38
	ANOVA table	SS	DF	MS	F (DFn, DFd)	P value
	Interaction	0.1693	1	0.1693	F (1, 16) = 0.2159	P=0.6484
	Row Factor	0.4248	1	0.4248	F (1, 16) = 0.5419	P=0.4723
	Column Factor	13.53	1	13.53	F (1, 16) = 17.26	P=0.0007

## Sheet: Suppl. Fig. 4
	Supplementary Figure 4b (Females)
	Unpaired t test
	P value	0.0525
	P value summary	ns
	Significantly different (P < 0.05)?	No
	One- or two-tailed P value?	Two-tailed
	t, df	t=2.094, df=16
	Supplementary Figure 4b (Males)
	Unpaired t test
	P value	0.6828
	P value summary	ns
	Significantly different (P < 0.05)?	No
	One- or two-tailed P value?	Two-tailed
	t, df	t=0.4150, df=19
	Supplementary Figure 4c (Females)
	Unpaired t test
	P value	0.4466
	P value summary	ns
	Significantly different (P < 0.05)?	No
	One- or two-tailed P value?	Two-tailed
	t, df	t=0.7791, df=17
	Supplementary Figure 4c (Males)
	Unpaired t test
	P value	0.6325
	P value summary	ns
	Significantly different (P < 0.05)?	No
	One- or two-tailed P value?	Two-tailed
	t, df	t=0.4860, df=19

[truncated: 9 more sheets: Suppl. Fig. 5, Suppl. Fig. 6, Suppl. Fig. 8, Suppl. Table 1, Suppl. Table 2, Suppl. Table 3, Suppl. Table 4, Suppl. Table 5, Suppl. Table 6]
